# Supplementary material for: Cation-exchange-assisted formation of NiS/SnS2 porous nanowalls with ultrahigh energy density for battery–supercapacitor hybrid devices
Source: Royal Society of Chemistry journal article supplement (doi:10.1039/c9ta11517j), 2020-01-01
Supplement: c9ta11517j1.pdf [file c9ta11517j1.pdf]

## Electronic Supplementary Information

### **Cation-exchange-assisted formation of NiS/SnS<sub>2</sub> porous nanowalls with ultrahigh energy density for battery-supercapacitor hybrid devices**

Shundong Guan,<sup>a,b</sup> Xiuli Fu,<sup>\*a</sup> Bo Zhang,<sup>a</sup> Ming Lei<sup>a</sup> and Zhijian Peng<sup>\*b</sup>

<sup>a</sup> State Key Laboratory of Information Photonics and Optical Communications, and School of Science, Beijing

University of Posts and Telecommunications, Beijing 100876, P. R. China

<sup>b</sup> School of Science, China University of Geosciences, Beijing 100083, P. R. China

<sup>\*a</sup> E-mail: xiulifu@bupt.edu.cn (X Fu); Tel: 86-10-62282242; Fax: 86-10-62282242;

<sup>\*b</sup> E-mail: pengzhijian@cugb.edu.cn (Z Peng); Tel: 86-10-82320255; Fax: 86-10-82322624;

Financial support from the National Natural Science Foundation of China (grant nos. 11674035), and BUPT

Excellent Ph.D. Students Foundation (grant no. CX2018214) is gratefully acknowledged.

## Supplementary Figures

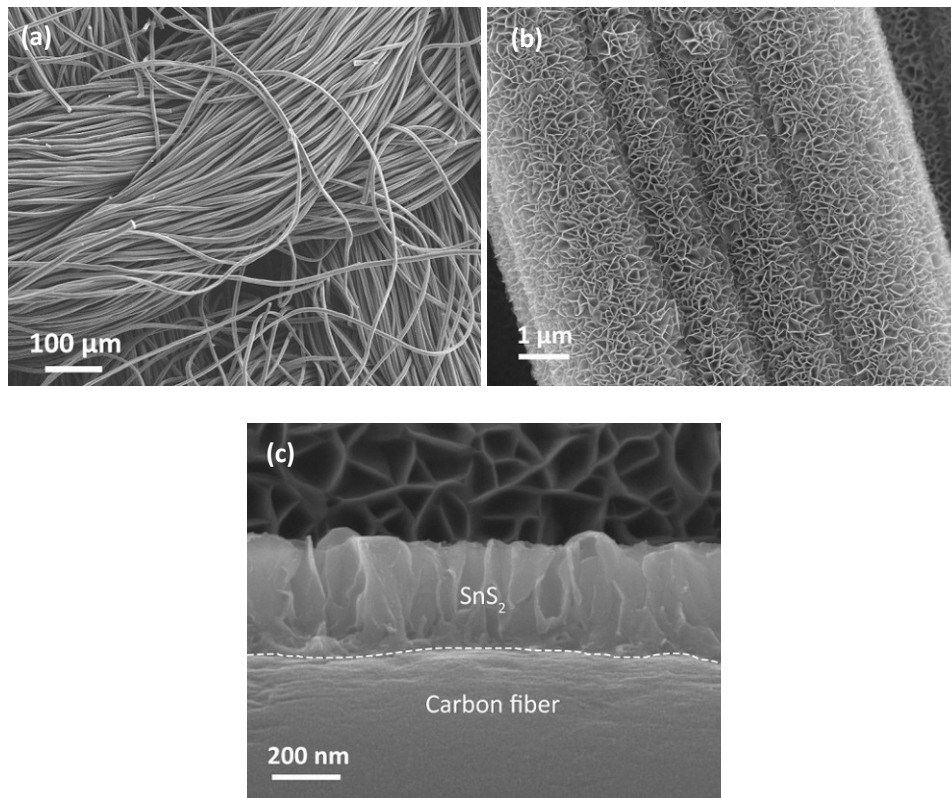

**Fig. S1** Typical surface SEM images of bare CC **(a)** and SnS<sub>2</sub>@CC **(b)**, respectively. SEM image of a fractured SnS<sub>2</sub>@CC **(c)**.

From **Fig. S1a**, it can be seen that CC shows a braided structure, consisting of many oriented carbon fibers with an average diameter of approximately 10 μm. As is seen in **Fig. S1b** and **1c**, the SnS<sub>2</sub> nanosheets directly and vertically grew on the surface of the carbon fibers in CC, which have an average height of approximately 300 nm.

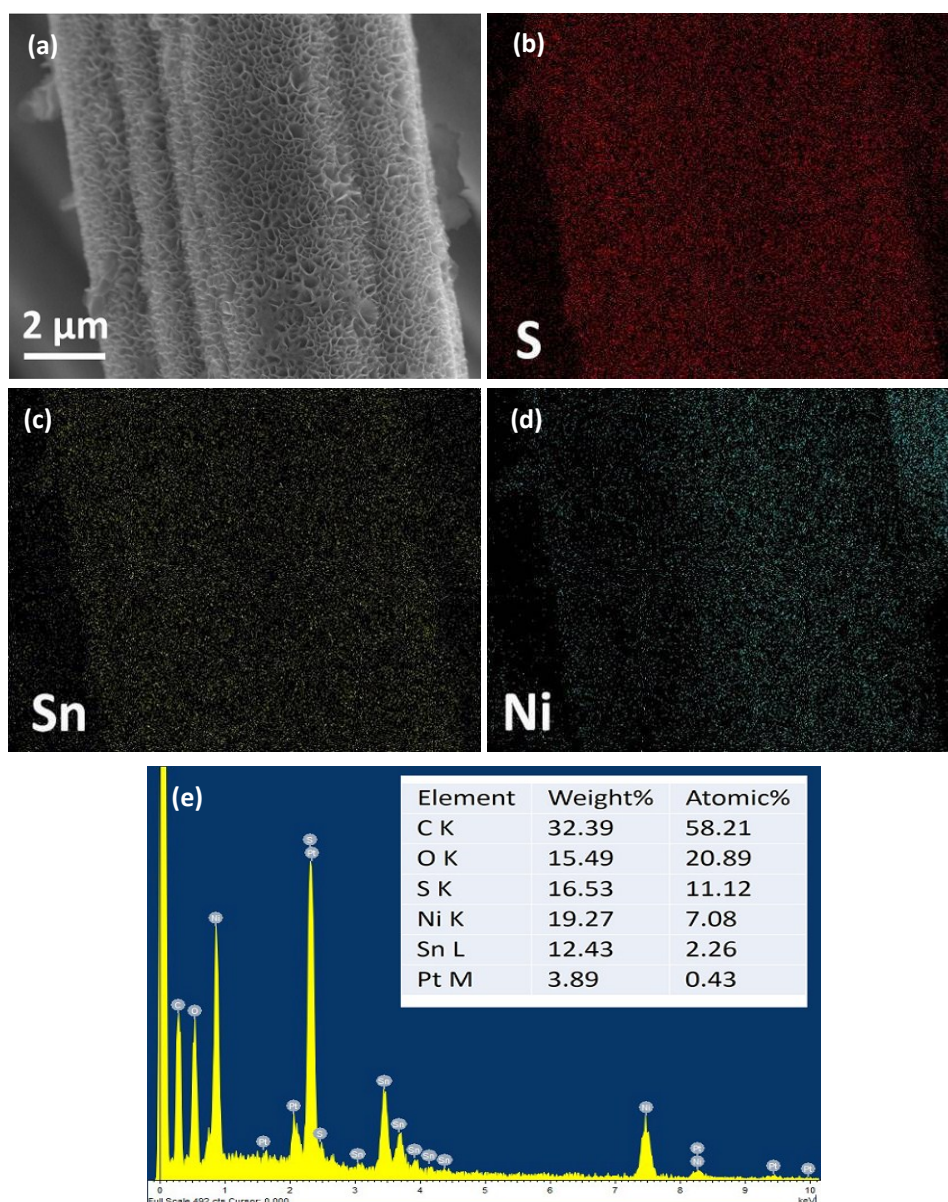

**Fig. S2** Typical SEM-EDX results for NiS/SnS<sub>2</sub>@CC synthesized with a reaction time of 6 h. **(a)** SEM image and the corresponding mapping images of **(b)** S, **(c)** Sn, and **(d)** Ni. **(e)** EDX spectrum and the corresponding elemental contents.

From the SEM-EDX mapping images (**Fig. S2a-2d**), it can be seen that the S, Sn, and Ni atoms are uniformly distributing on the whole surface of carbon fibers, indicating that NiS evenly grew on the surface of SnS<sub>2</sub> template. The contents of S, Sn, and Ni atoms present a relationship of  $S \approx 2Sn + Ni$ , which is well matching with the stoichiometry of SnS<sub>2</sub> + NiS (**Fig. S2e**). In addition, the molar content of NiS in the NiS/SnS<sub>2</sub> composite can be determined as approximately 75.8% (**Fig. S2e**).

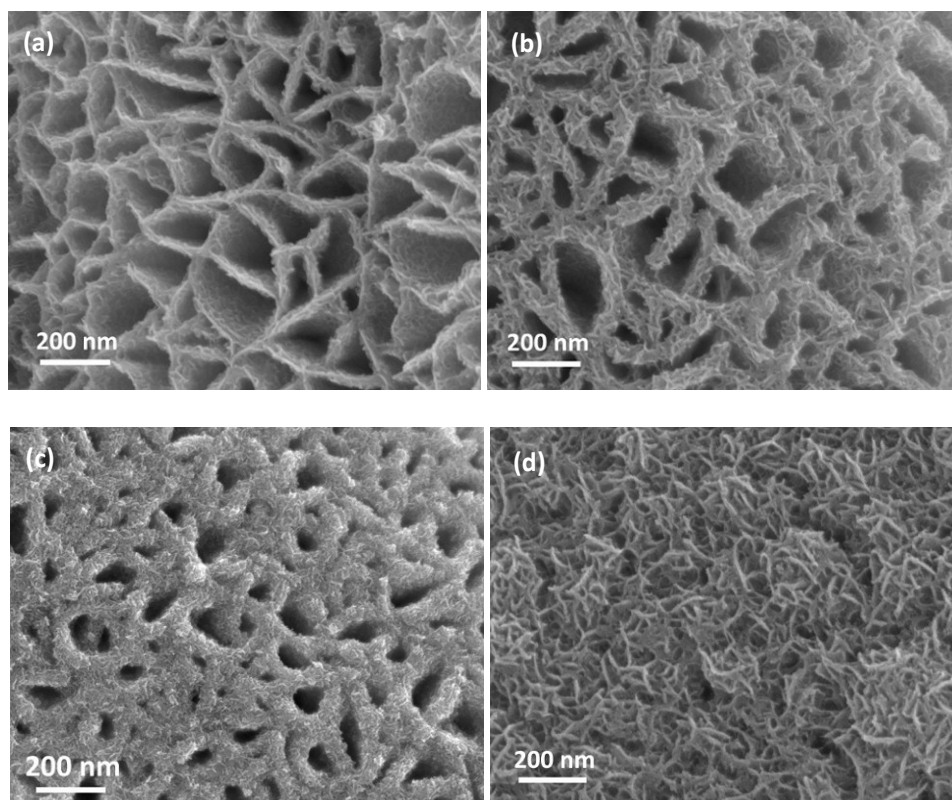

**Fig. S3** SEM images of NiS/SnS<sub>2</sub>@CC synthesized with different cation-exchange reaction times: **(a)** 4, **(b)** 8, **(c)** 10, and **(d)** 12 h.

The morphology of NiS/SnS<sub>2</sub> changes with the cation-exchange reaction time. With a reaction time of 4 h, only small amount of SnS<sub>2</sub> was replaced by NiS and the sheet-like structure of the precursor almost had no changes (**Fig. S3a**). Prolonging the reaction time to 6-8 h, the nanosheets changed into porous nanowalls due to the formation of a large amount of porous NiS (**Fig. 1c** and **Fig. S3b**). However, when the reaction time was extend to more than 10 h (**Fig. S3c** and **3d**), the nanowalls gradually collapsed due to the absence of the inner SnS<sub>2</sub> “skeleton”, indicating that SnS<sub>2</sub> was completely transformed into NiS.

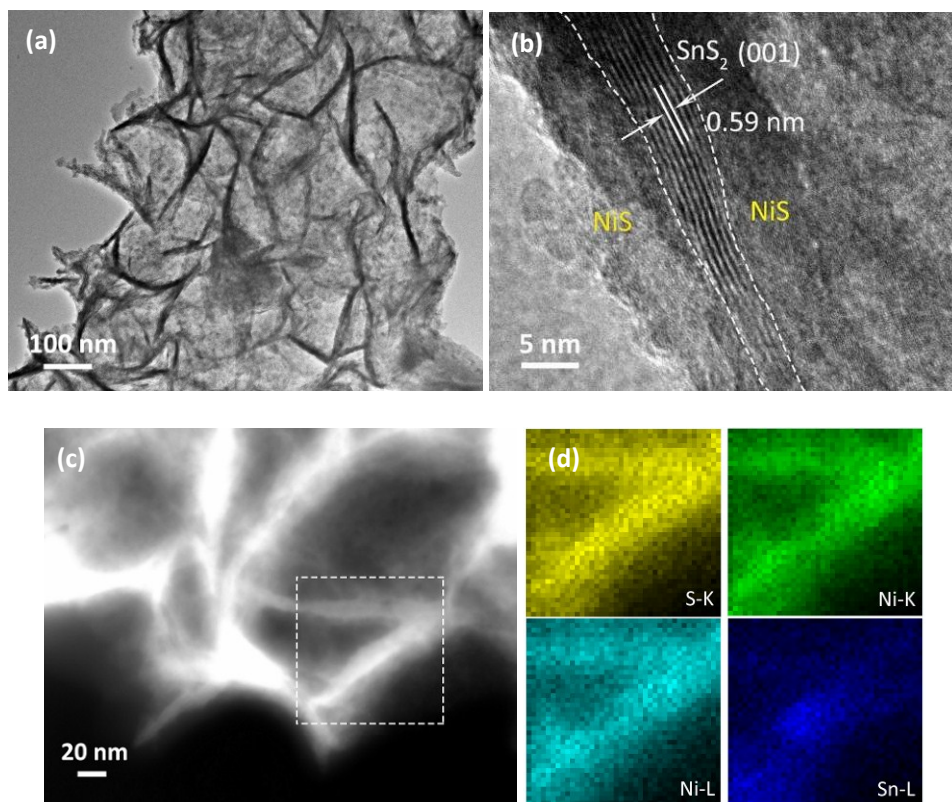

**Fig. S4** Typical TEM results for NiS/SnS<sub>2</sub> heterogeneous nanowalls synthesized with a cation-exchange reaction time of 6 h. **(a)** Typical TEM image, **(b)** HRTEM image, **(c)** STEM image, and **(d)** the corresponding elemental mapping images of S, Ni and Sn in the squared area in (c).

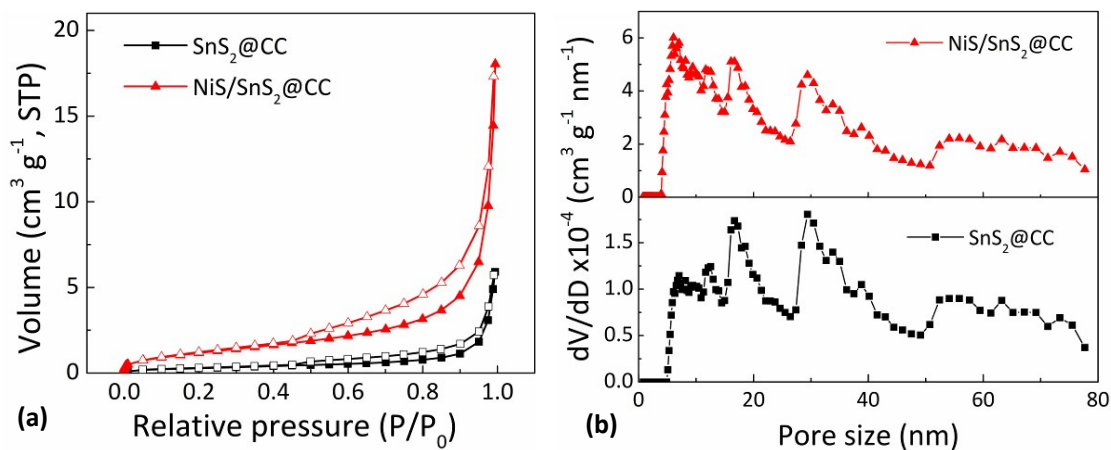

**Fig. S5 (a)** Nitrogen adsorption/desorption isotherms for the SnS<sub>2</sub>@CC and NiS/SnS<sub>2</sub>@CC electrodes. **(b)** The corresponding pore-size distribution curves obtained by the BJH method.

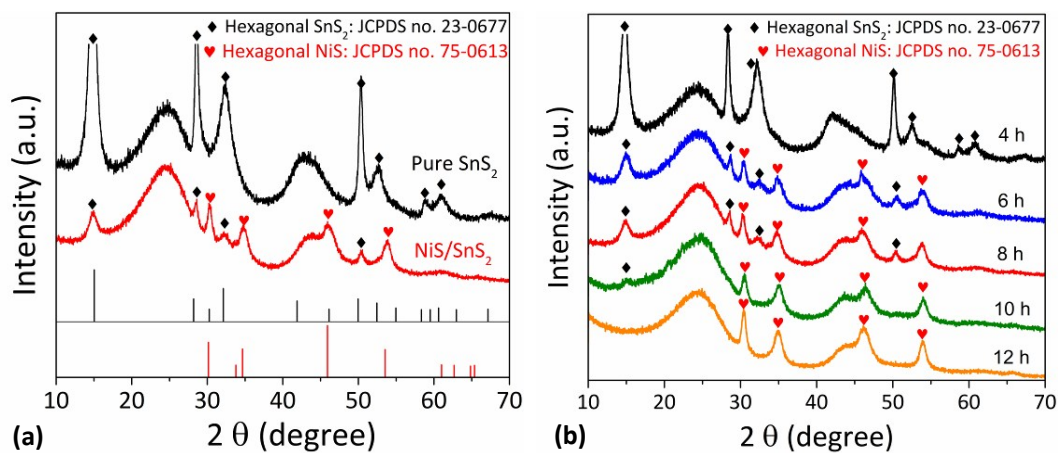

**Fig. S6 (a)** XRD patterns of SnS<sub>2</sub>@CC and NiS/SnS<sub>2</sub>@CC (6 h). **(b)** Comparison on the XRD patterns of NiS/SnS<sub>2</sub>@CC composites prepared with different cation-exchange reaction times.

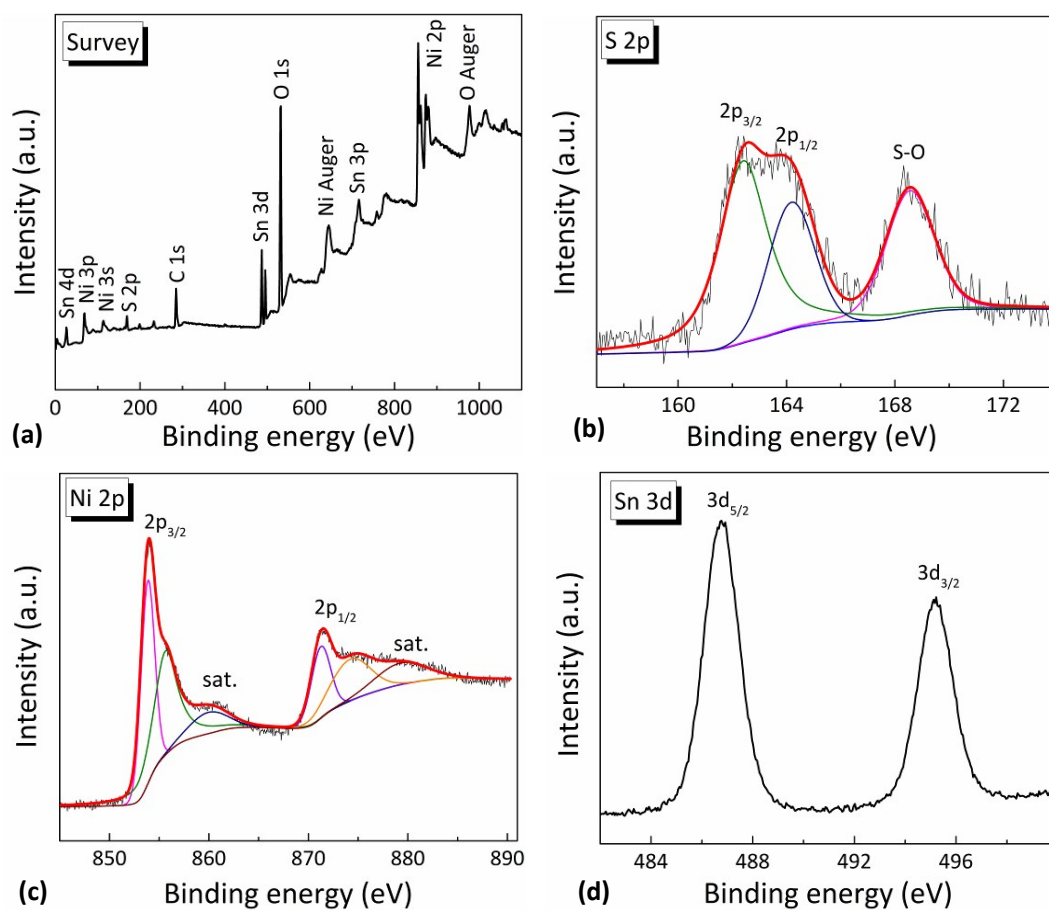

**Fig. S7** Typical XPS analysis results for NiS/SnS<sub>2</sub>@CC composite (6 h). **(a)** XPS survey spectrum. High-resolution spectra of S 2p **(b)**, Ni 2p **(c)**, and Sn 3d **(d)**.

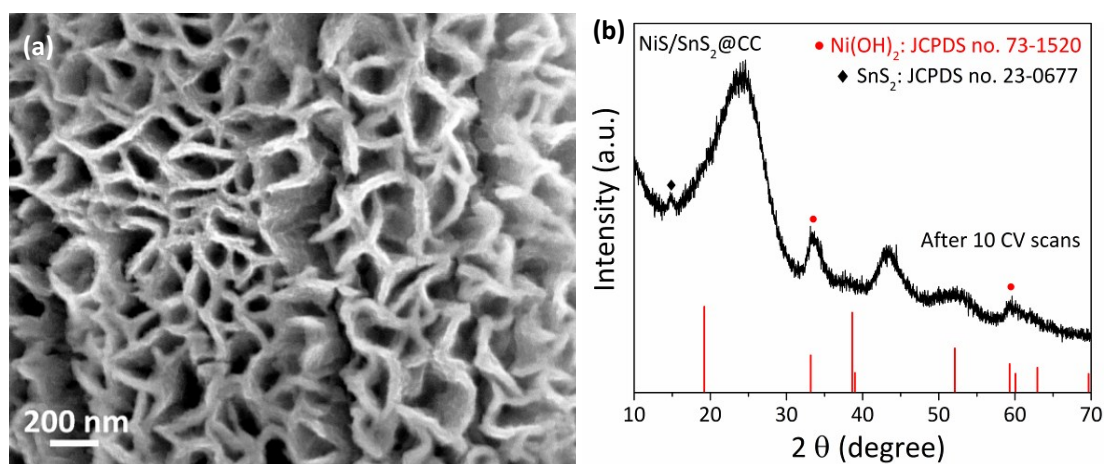

**Fig. S8** **(a)** SEM image and **(b)** XRD pattern of the NiS/SnS<sub>2</sub>@CC electrode recorded after the first 10 CV cycles at 2 mV s<sup>-1</sup>.

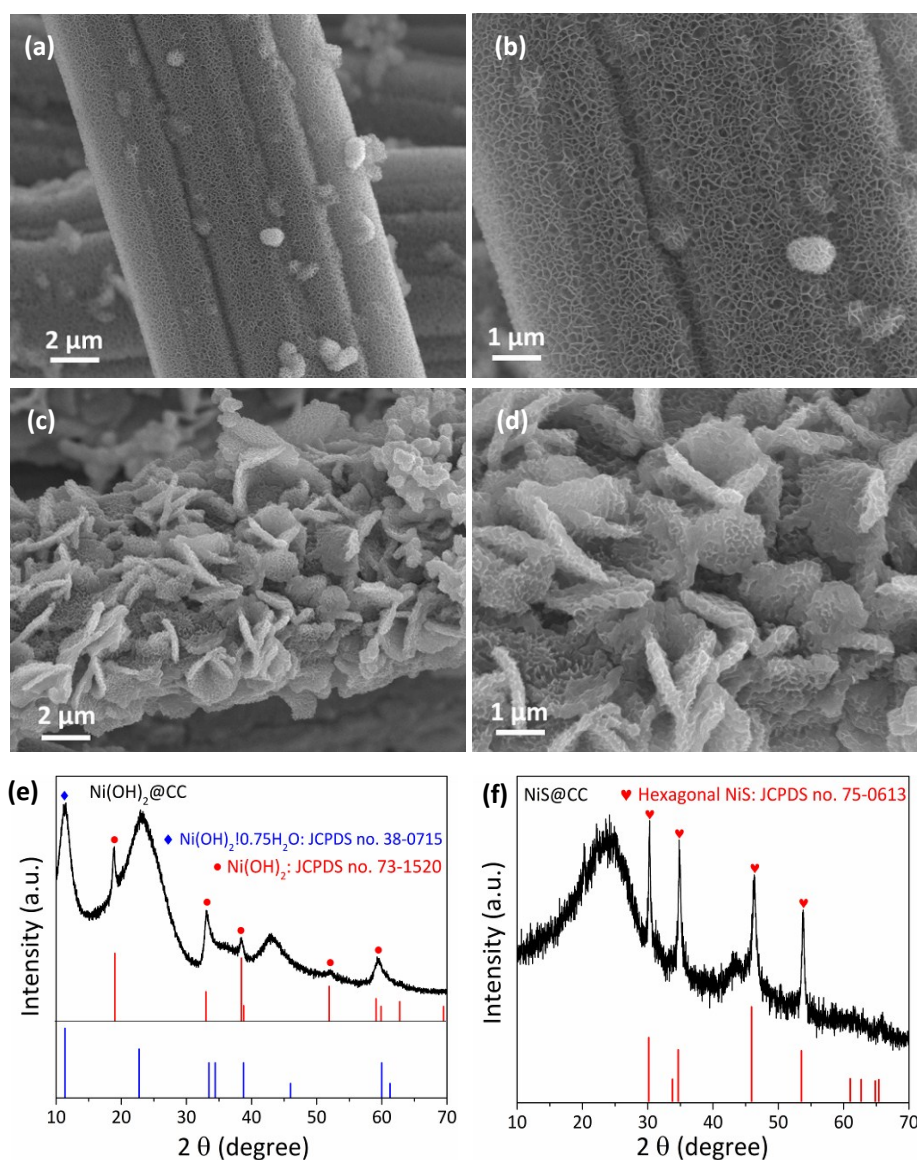

**Fig. S9** SEM images at low- and high-magnification of Ni(OH)<sub>2</sub>@CC (**a,b**) and NiS@CC (**c,d**). XRD patterns of Ni(OH)<sub>2</sub>@CC (**e**) and NiS@CC (**f**).

As shown in **Fig. S9a,b**, many nanosheets vertically covered the surface of carbon fibers to form a honeycomb-like structure. After the sulfidation process, the honeycomb structure re-constructed into many big micro-nanosheets with rough surface (**Fig. S9c,d**). In the XRD pattern of Ni(OH)<sub>2</sub>@CC (**Fig. S9e**), the peaks marked in red dots match well with the hexagonal Ni(OH)<sub>2</sub> phase (JCPDS no. 73-1520). However, the strong and wide peak centered at  $2\theta$  value of 11.35° can be indexed to the hydrate of rhombohedral Ni(OH)<sub>2</sub>·0.75H<sub>2</sub>O phase (JCPDS no. 38-0715). For the XRD pattern of NiS@CC, all the peaks can be assigned to the hexagonal NiS phase (JCPDS no. 75-0613), which is similar to the XRD result of NiS/SnS<sub>2</sub>@CC.



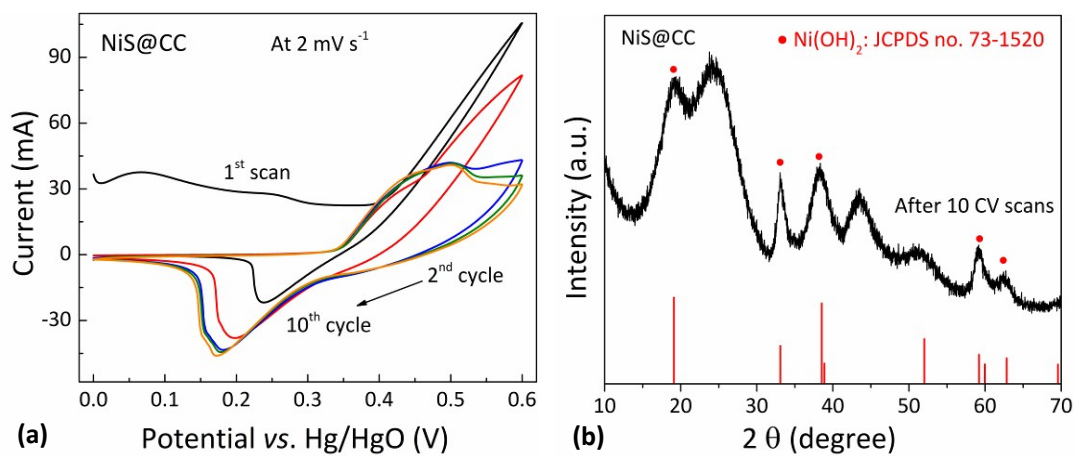

**Fig. S10** (a) The first 10 CV cycles at  $2 \text{ mV s}^{-1}$  for the NiS@CC electrode. (b) XRD pattern of NiS@CC recorded after 10 CV cycles.

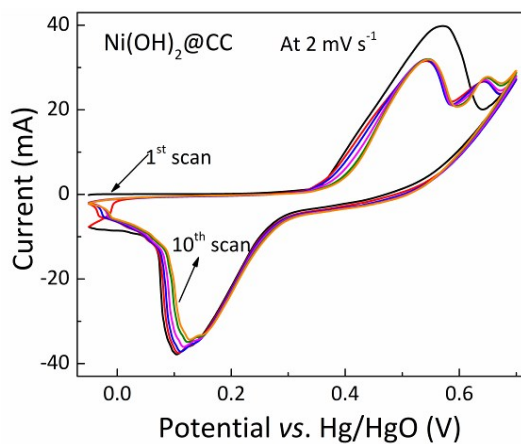

**Fig. S11** The first 10 CV cycles at  $2 \text{ mV s}^{-1}$  for the Ni(OH)<sub>2</sub>@CC electrode.

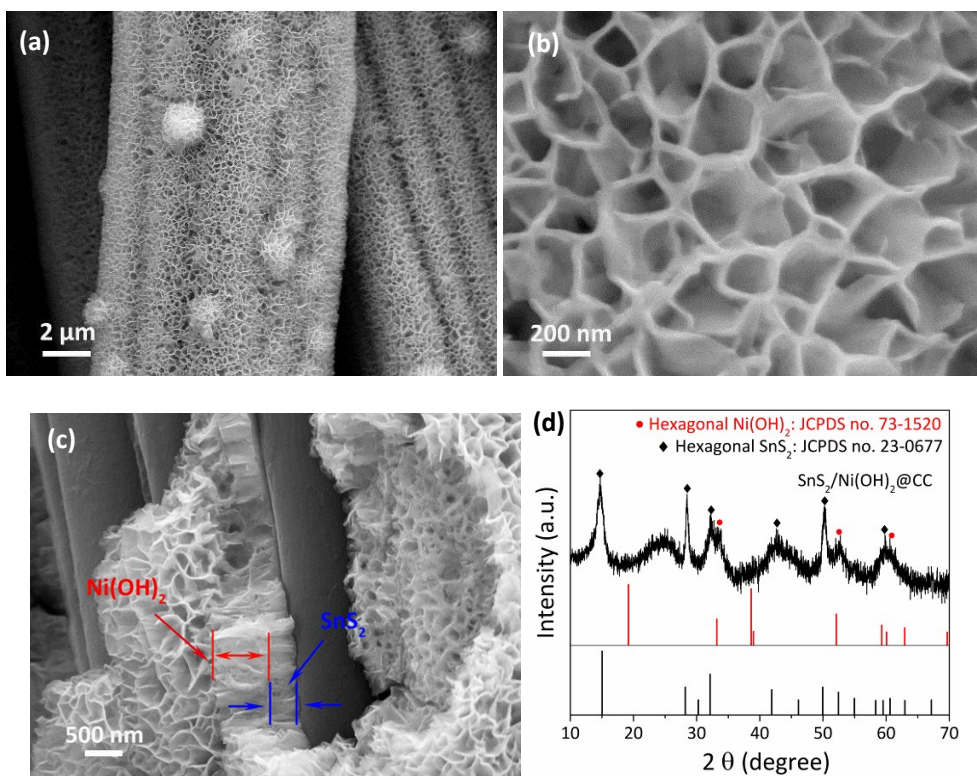

**Fig. S12** SEM images (a-c) and XRD pattern (d) of Ni(OH)<sub>2</sub>/SnS<sub>2</sub>@CC.

To make a fair comparison with NiS/SnS<sub>2</sub>@CC, Ni(OH)<sub>2</sub>/SnS<sub>2</sub>@CC was further prepared by growing Ni(OH)<sub>2</sub> on the surface of SnS<sub>2</sub>@CC. In the SEM images as shown in **Fig. S12a,b**, the Ni(OH)<sub>2</sub> nanosheets are wrapped on the surface of SnS<sub>2</sub>@CC, and each nanosheet shows an average size of approximately 200 nm and a thickness of about 50 nm. From the SEM image of a fractured surface (**Fig. S12c**), it can be seen that the Ni(OH)<sub>2</sub> nanosheets epitaxially grew on the SnS<sub>2</sub> nanosheets template (see **Fig. S1**), and the thickness of the Ni(OH)<sub>2</sub> layer is about 700 nm. According to the weight change before and after the Ni(OH)<sub>2</sub> growth, the content of Ni(OH)<sub>2</sub> was calculated as about 56.4 wt.%.

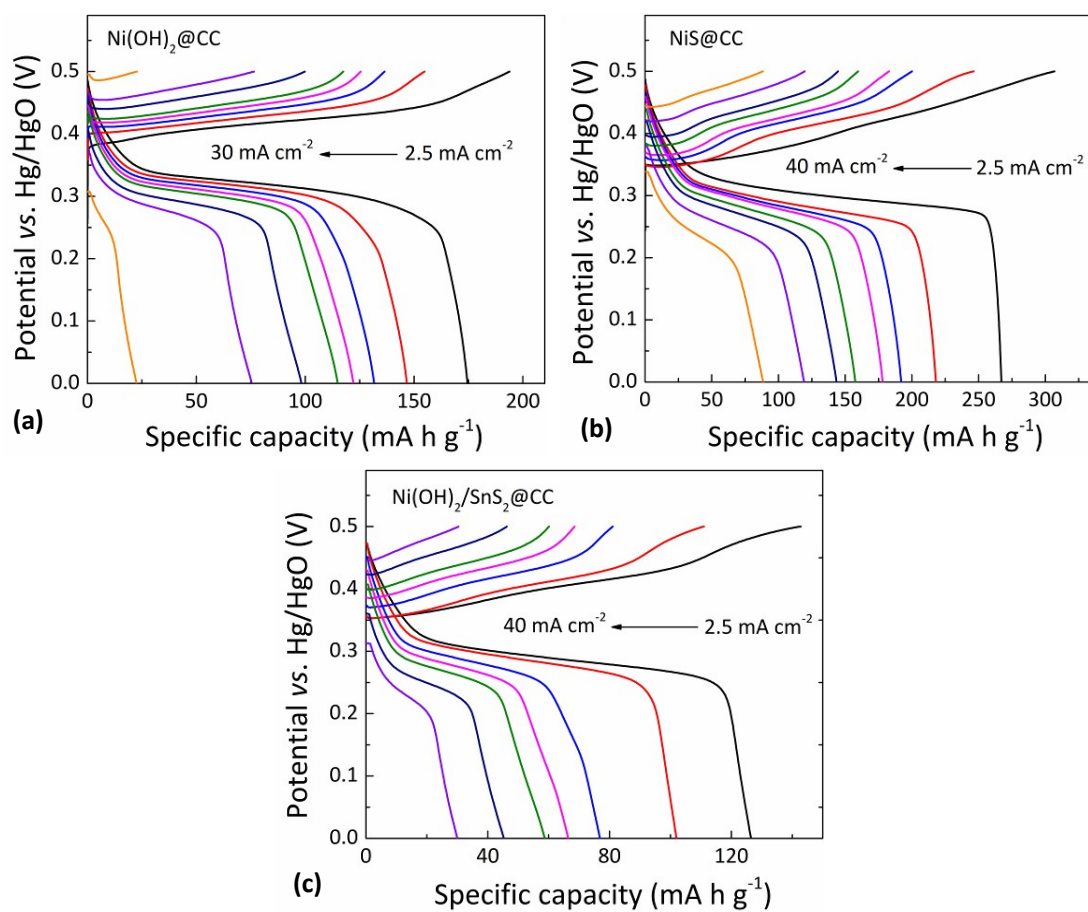

**Fig. S13** GCD curves for (a)  $\text{Ni(OH)}_2@CC$ , (b)  $\text{NiS}@CC$  and (c)  $\text{Ni(OH)}_2/\text{SnS}_2@CC$  electrodes at different current densities.

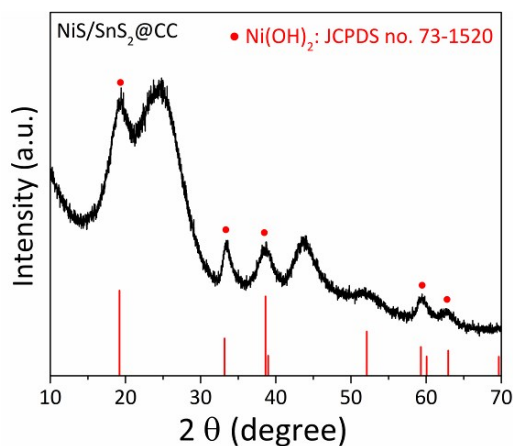

**Fig. S14** XRD pattern of the NiS/SnS<sub>2</sub>@CC electrode after 1000 GCD cycles at 15 mA cm<sup>-2</sup>.

For the NiS/SnS<sub>2</sub>@CC electrode after 1000 GCD cycles at a high current density of 15 mA cm<sup>-2</sup>, all the diffraction peaks can be indexed to the Ni(OH)<sub>2</sub> phase, indicating that Ni(OH)<sub>2</sub> is still the main redox active species in the NiS/SnS<sub>2</sub>@CC electrode. However, the peaks for SnS<sub>2</sub> are not detected in XRD pattern, possibly because SnS<sub>2</sub> has changed into amorphous state after a long-time redox reaction.

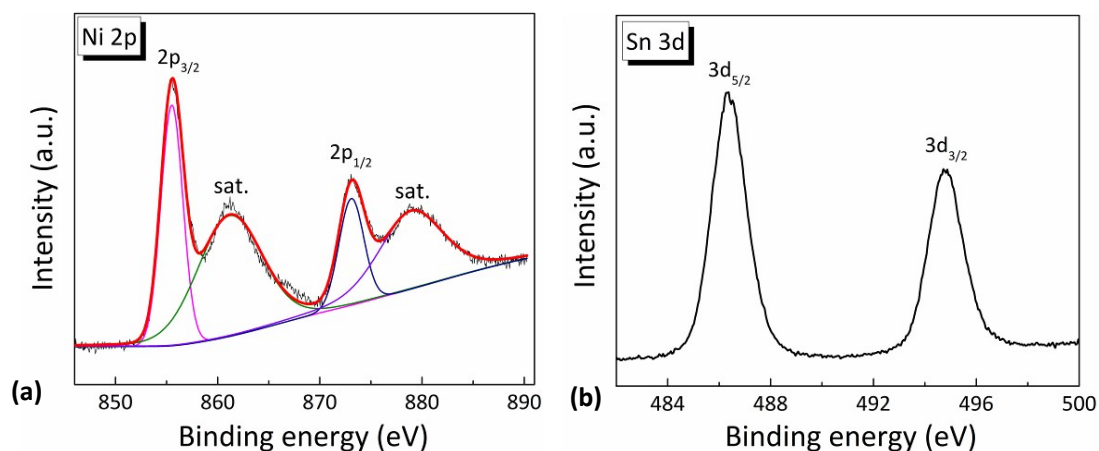

**Fig. S15** High-resolution XPS spectra of (a) Ni 2p and (b) Sn 3d for the NiS/SnS<sub>2</sub>@CC electrode after 1000 GCD cycles at 15 mA cm<sup>-2</sup>.

In Ni 2p high-resolution spectrum (**Fig. S15a**), the peaks at 855.6 and 873.1 eV are matching well with the binding energies of Ni 2p<sub>3/2</sub> and Ni 2p<sub>1/2</sub> for Ni<sup>2+</sup> in Ni(OH)<sub>2</sub>, respectively. The two wide peaks at 861.3 and 879.1 eV can be assigned to the corresponding satellite peaks.<sup>S1</sup> For Sn 3d spectrum (**Fig. S15b**), the two distinct peaks at 486.8 and 495.2 eV are well matching with the binding energies of 3d<sub>5/2</sub> and 3d<sub>3/2</sub> for Sn<sup>4+</sup> in SnS<sub>2</sub>, which is consistent with **Fig. S7d**. This result confirms the existence of SnS<sub>2</sub> in NiS/SnS<sub>2</sub>@CC electrode after 1000 GCD cycles.

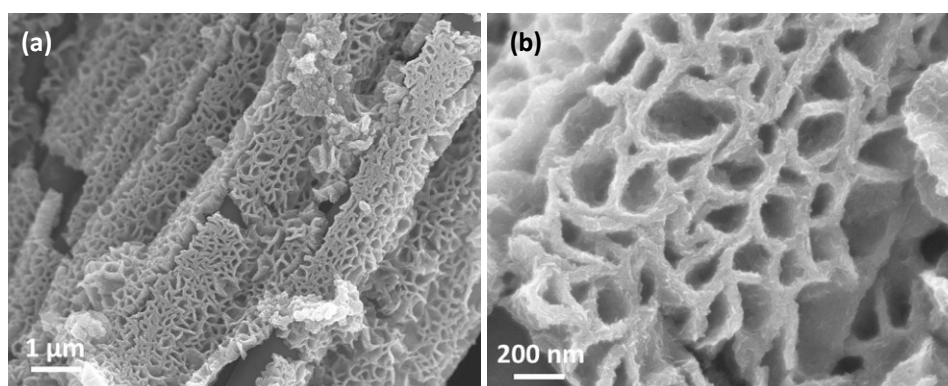

**Fig. S16** (a) Low- and (b) high-magnification SEM images of the NiS/SnS<sub>2</sub>@CC electrode after 1000 GCD cycles at 15 mA cm<sup>-2</sup>.

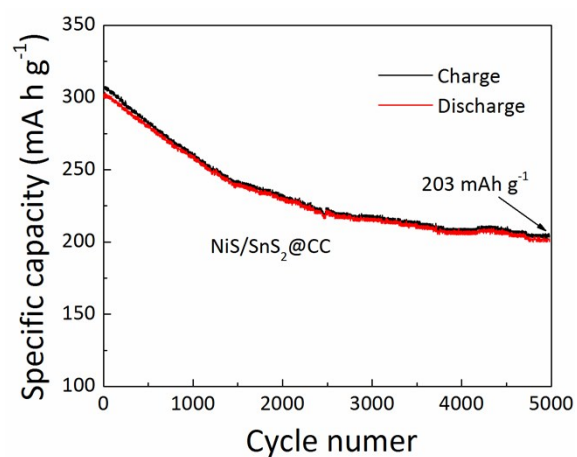

**Fig. S17** Long-term GCD testing results of NiS/SnS<sub>2</sub>@CC electrode, which were measured at a constant current density of 15 mA cm<sup>-2</sup>.

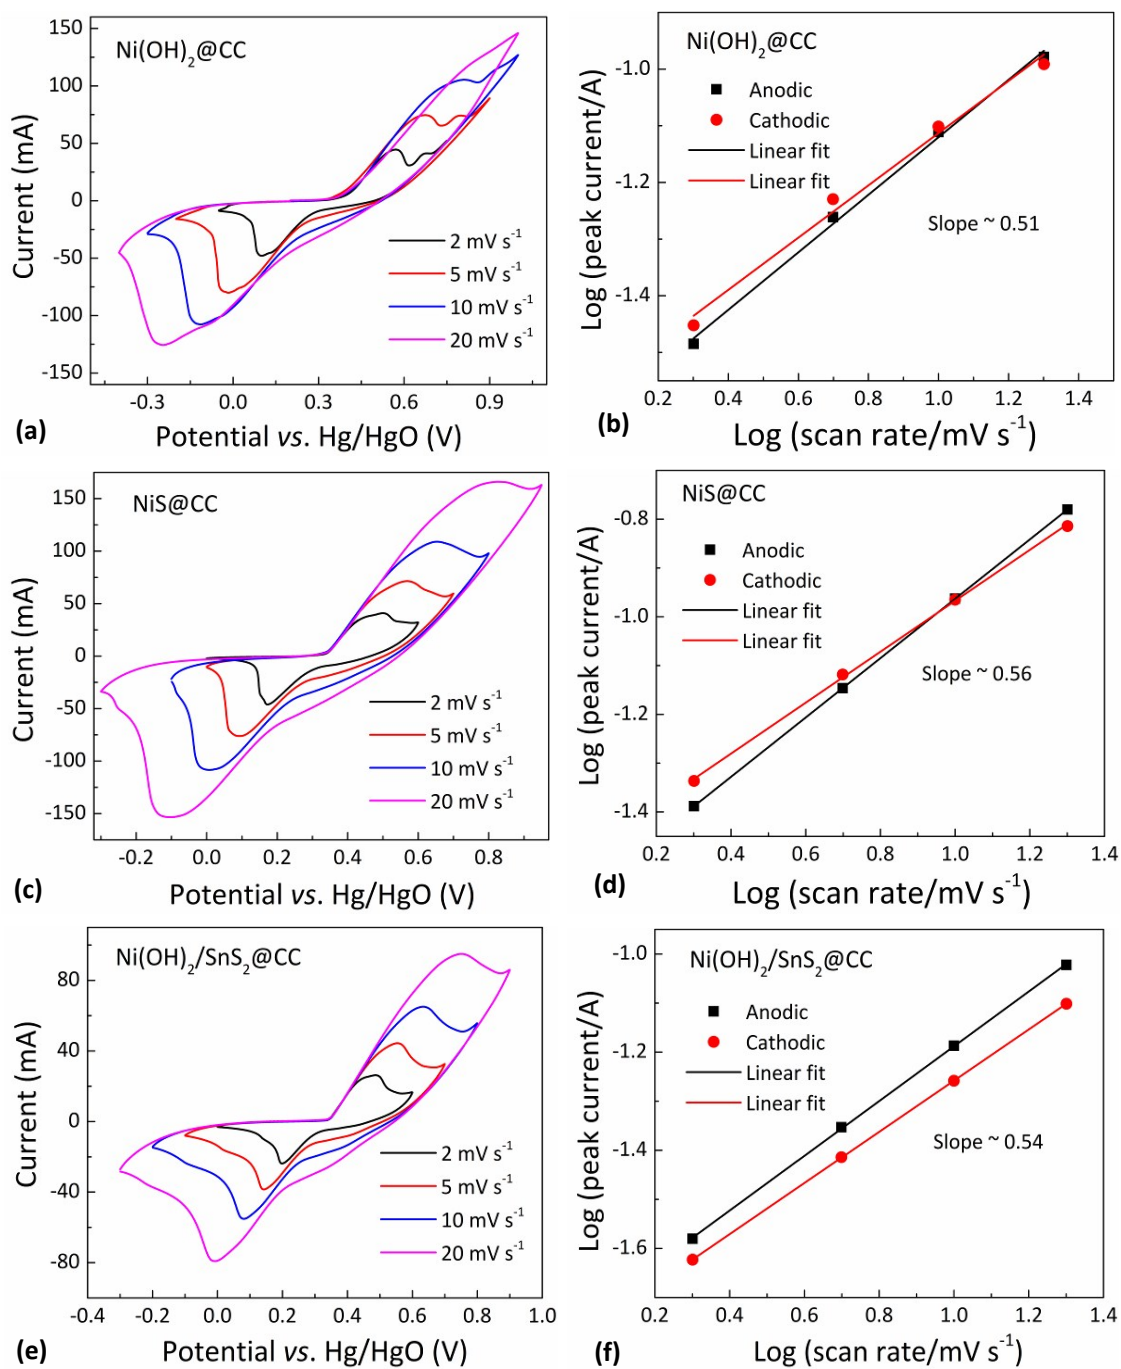

**Fig. S18** CV curves at different scan rates and the corresponding linear fittings of the log (peak current) versus log (scan rate) for the cathodic and anodic peaks over (a,b)  $\text{Ni(OH)}_2@CC$ , (c,d)  $\text{NiS@CC}$  and (e,f)  $\text{Ni(OH)}_2/\text{SnS}_2@CC$  electrodes, respectively.

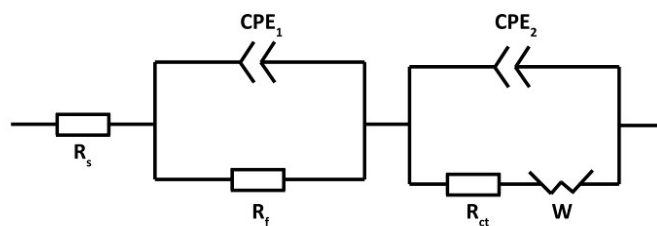

**Fig. S19** Equivalent circuit model of the Nyquist diagram for the impedance measurement of the electrodes.

$R_s$  is the inner series resistance of the cell,  $R_f$  is the surface film resistance,  $R_{ct}$  is the charge transfer resistance,  $CPE$  is the constant phase element, and  $W$  is the Warburg diffusion resistance.

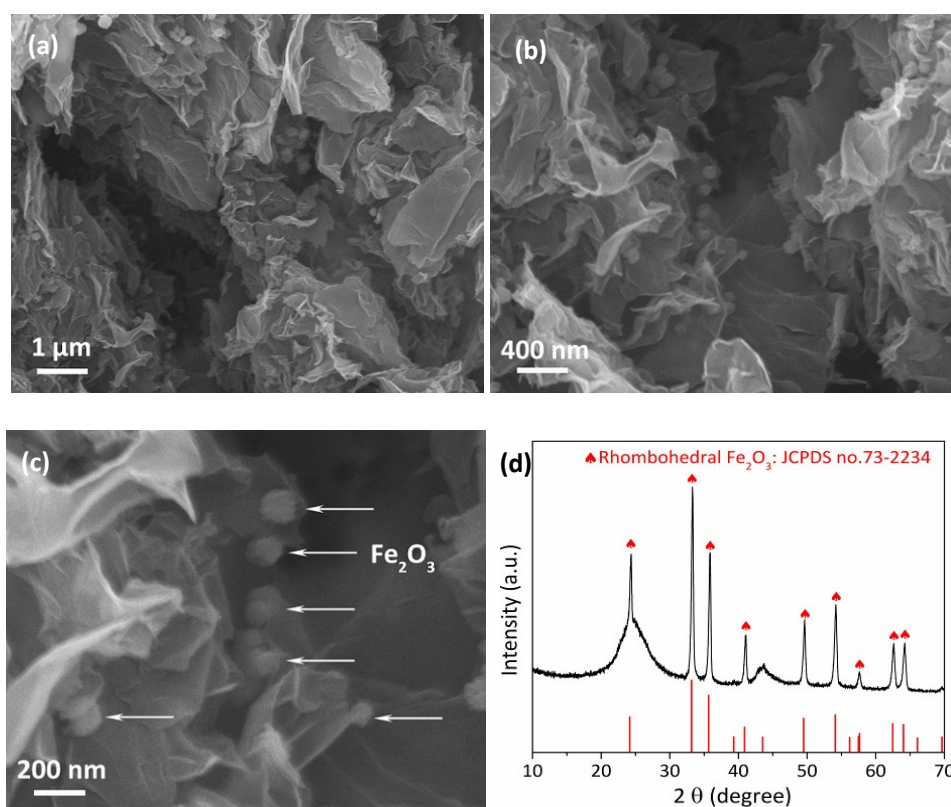

**Fig. S20 (a-c)** Low- to high-magnification SEM images and **(d)** XRD pattern of the as-prepared  $\text{Fe}_2\text{O}_3/\text{rGO}$  nanocomposite.

From **Fig. S20a-c**, it can be seen that many  $\text{Fe}_2\text{O}_3$  nanoparticles with a diameter of approximately 100 nm are uniformly distributing in the matrix of rGO. As shown in **Fig. S20d**, all the sharp diffraction peaks are matching well with those of the rhombohedral  $\text{Fe}_2\text{O}_3$  phase (JCPDS no. 73-2234), and the two weak humps centered at  $2\theta$  values of  $25^\circ$  and  $43^\circ$  can be indexed to the amorphous carbon species in rGO. All these results confirm that the  $\text{Fe}_2\text{O}_3/\text{rGO}$  nanocomposite was successfully synthesized. Moreover, the content of  $\text{Fe}_2\text{O}_3$  in  $\text{Fe}_2\text{O}_3/\text{rGO}$  is about 37.3 wt.%, which is estimated by the weight change before and after the etching of  $\text{Fe}_2\text{O}_3$ .

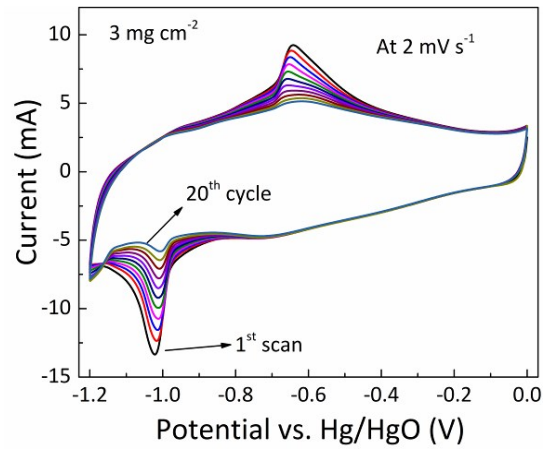

**Fig. S21** The first 20 CV cycles at  $2 \text{ mV s}^{-1}$  for the  $\text{Fe}_2\text{O}_3/\text{rGO}$  electrode with a mass loading of  $3 \text{ mg cm}^{-2}$ .

Similarly, the CV curves change along with the scan time, indicating that there is a phase transformation process over the  $\text{Fe}_2\text{O}_3/\text{rGO}$  electrode. According to Ref. S2, such a phase transformation process can be described as follows:

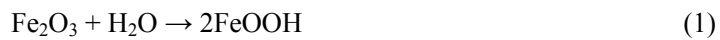

$\text{Fe}_2\text{O}_3$  changes into low-crystalline FeOOH nanoparticles, which is the active species for the charge-storage in alkaline aqueous solution:

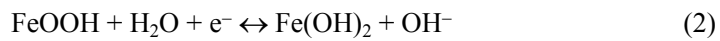



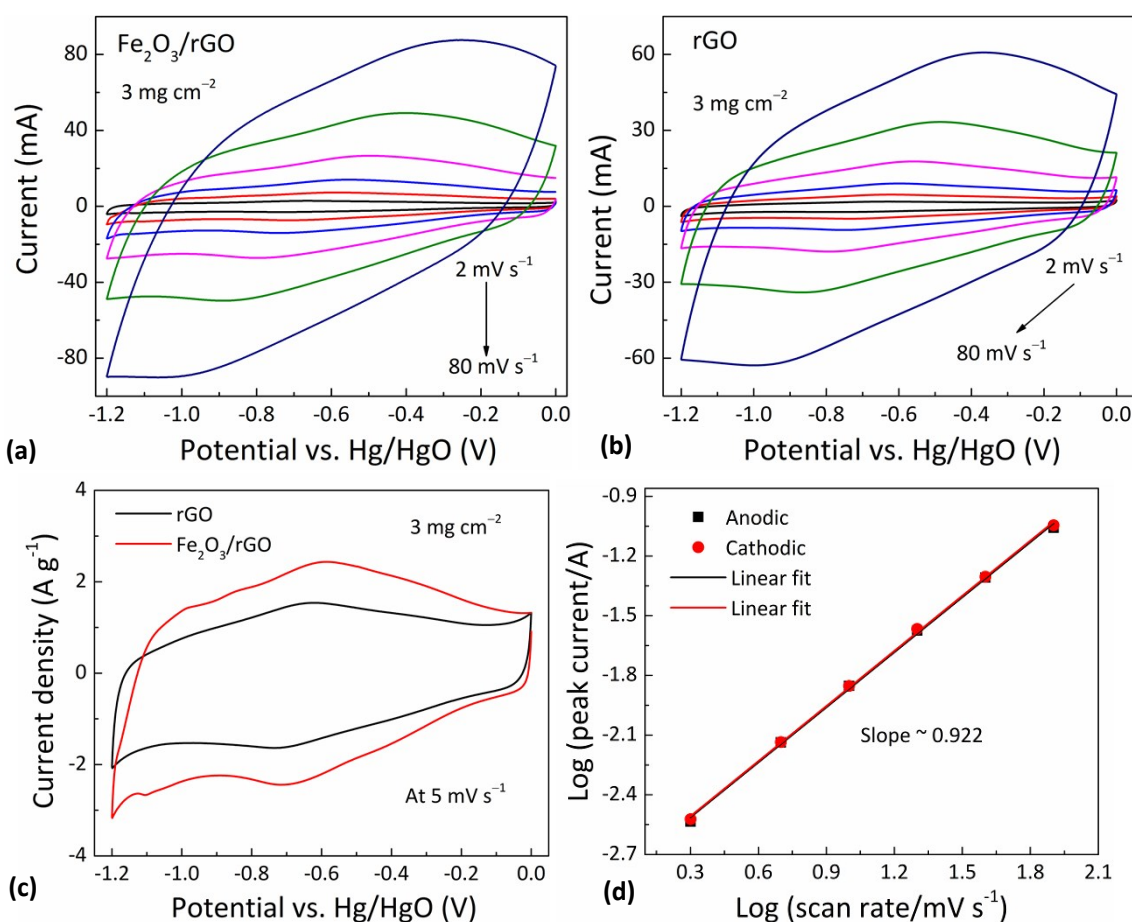

**Fig. S22** CV curves at various scan rates from 2 to 80  $\text{mV s}^{-1}$  of (a)  $\text{Fe}_2\text{O}_3/\text{rGO}$  and (b) rGO electrode. (c) The comparison on CV curves at 5  $\text{mV s}^{-1}$  of  $\text{Fe}_2\text{O}_3/\text{rGO}$  and rGO electrodes. (d) The linear fittings of log (peak current) versus log (scan rate) for the  $\text{Fe}_2\text{O}_3/\text{rGO}$  electrode. The loading amounts of the active materials for the  $\text{Fe}_2\text{O}_3/\text{rGO}$  and rGO electrodes are both  $3 \text{ mg cm}^{-2}$ .

As shown in **Fig. S22a**, for the  $\text{Fe}_2\text{O}_3/\text{rGO}$  electrode, a pair of wide redox peaks can be observed at all scan rates and their peak position and intensity change with the scan rate. As a comparison, the rGO electrode was prepared by completely etching  $\text{Fe}_2\text{O}_3$  in the  $\text{Fe}_2\text{O}_3/\text{rGO}$  composite. As shown in **Fig. S22b**, the CV curves of the rGO electrode are similar to those of the  $\text{Fe}_2\text{O}_3/\text{rGO}$  electrode. Considering the high content of rGO (62.7 wt.%) in the  $\text{Fe}_2\text{O}_3/\text{rGO}$  composite, generally the electrochemical performance of  $\text{Fe}_2\text{O}_3/\text{rGO}$  electrode is mainly contributed by rGO. However, as is seen from the CV comparison in **Fig. S22c**, the bare rGO electrode shows a lower capacity than the  $\text{Fe}_2\text{O}_3/\text{rGO}$  electrode, indicating that combining with  $\text{Fe}_2\text{O}_3$  could enhance the specific capacity of the anode, because the pseudocapacitive material could store more charges through the redox reaction

process. In addition, from the fitted plot of  $\log$  (peak current,  $i$ ) and  $\log$  (scan rate,  $\nu$ ) for the  $\text{Fe}_2\text{O}_3/\text{rGO}$  electrode, it can be seen that  $\beta$  value (0.922) is very close to 1 (**Fig. S22d**), implying that the kinetics of charge storage process for the  $\text{Fe}_2\text{O}_3/\text{rGO}$  electrode is mainly controlled by a surface-controlled process and  $\text{Fe}_2\text{O}_3/\text{rGO}$  is a pseudocapacitive electrode material.

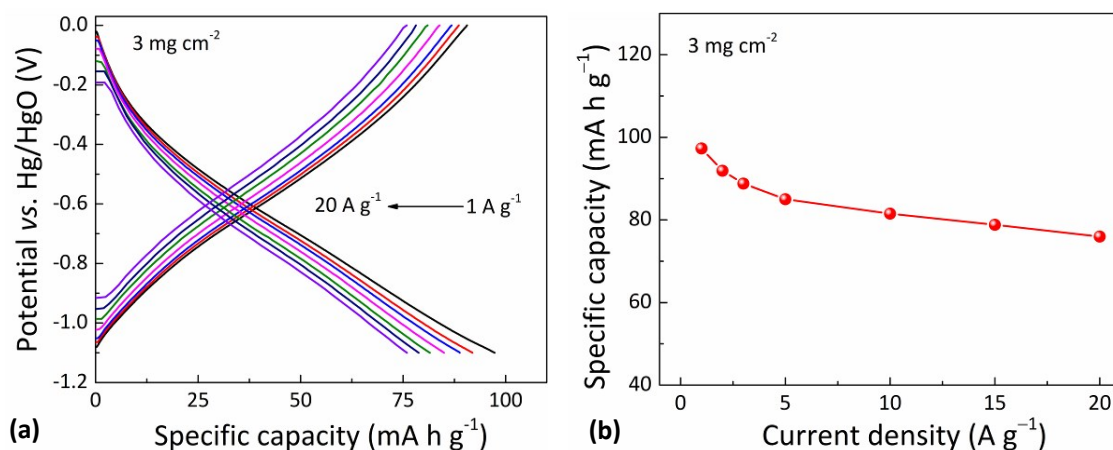

**Fig. S23** (a) GCD curves and (b) the corresponding specific capacities of the  $\text{Fe}_2\text{O}_3/\text{rGO}$  electrode with a mass loading of  $3 \text{ mg cm}^{-2}$ .

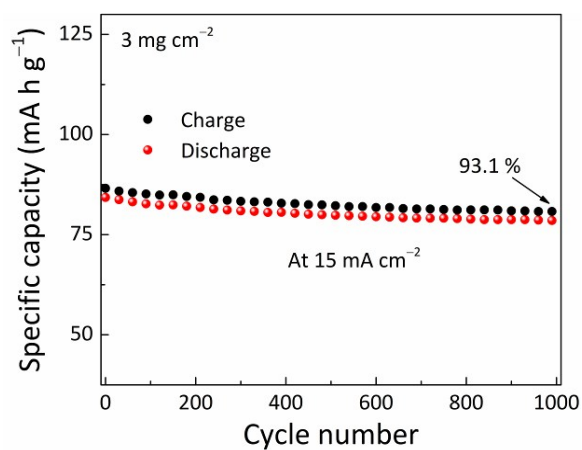

**Fig. S24** Cycling stability of the  $\text{Fe}_2\text{O}_3/\text{rGO}$  electrode with a mass loading of  $3 \text{ mg cm}^{-2}$ , which was tested at a current density of  $15 \text{ mA cm}^{-2}$ .

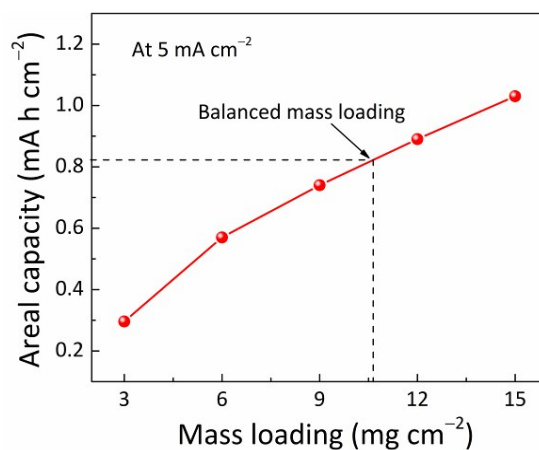

**Fig. S25** Areal capacities of the Fe<sub>2</sub>O<sub>3</sub>/rGO electrode with different mass loadings. All the samples were tested at a current density of 5 mA cm<sup>-2</sup>.

As shown in **Fig. S25**, the areal capacity ( $C_a$ ) of the Fe<sub>2</sub>O<sub>3</sub>/rGO electrode increases with the increases of mass loading. To obtain a balance between the NiS/SnS<sub>2</sub>@CC and Fe<sub>2</sub>O<sub>3</sub>/rGO@CC electrodes, a suitable mass loading for the Fe<sub>2</sub>O<sub>3</sub>/rGO electrode should be ascertained. Based on the charge balance equation  $Q^+ = Q^-$ , for complanate electrodes, the areal capacity of a cathode ( $C_a^+$ ) should equal to that of an anode ( $C_a^-$ ). According to the result shown in **Fig. 2e** (in Main Text), at a current density of 5 mA cm<sup>-2</sup>,  $C_a^+ = C_s^+ \times m_+ = 0.8163$  mA h cm<sup>-2</sup>. From the  $C_a$  vs.  $m$  plots (**Fig. S25**), to obtain the  $C_a$  value of 0.8163 mA h cm<sup>-2</sup>, the mass loading should be approximately 10.7 mg cm<sup>-2</sup> (the intersection of two dash lines). Thus, the balanced mass loading of the Fe<sub>2</sub>O<sub>3</sub>/rGO electrode is 10.7 mg cm<sup>-2</sup>.

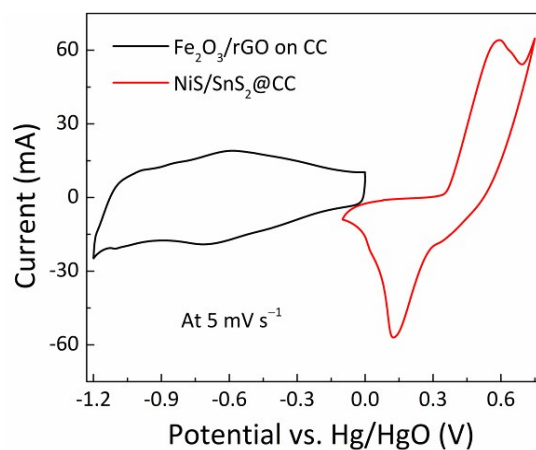

**Fig. S26** Comparison on the CV curves of the  $\text{Fe}_2\text{O}_3/\text{rGO}$  ( $m = 10.7 \text{ mg cm}^{-2}$ ) and  $\text{NiS}/\text{SnS}_2@\text{CC}$  electrodes at different potential windows, which were collected at a scan rate of  $5 \text{ mV s}^{-1}$ .

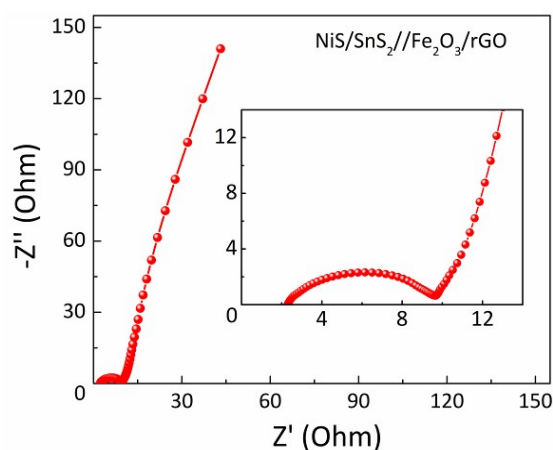

**Fig. S27** EIS Nyquist plots of the  $\text{NiS}/\text{SnS}_2//\text{Fe}_2\text{O}_3/\text{rGO}$  BSH device, where the inset shows the enlarged view in the high-frequency range. The  $R_s$  is about  $2.32 \Omega$ , and  $R_{ct}$  is about  $7.45 \Omega$ .

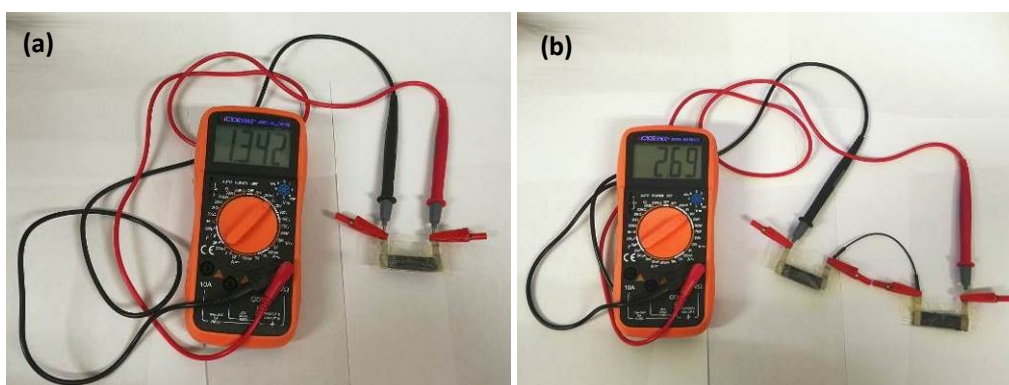

**Fig. S28** Optical photographs showing the operation voltages of (a) a single cell and (b) two tandem NiS/SnS<sub>2</sub>//Fe<sub>2</sub>O<sub>3</sub>/rGO BSH devices.

As shown in **Fig. S28**, the operation voltages of a single cell and two tandem NiS/SnS<sub>2</sub>//Fe<sub>2</sub>O<sub>3</sub>/rGO BSH devices were measured as 1.342 and 2.69 V, respectively. It should be noted that the practical operation voltage is always lower than the voltage window used for GCD test due to the voltage drop that originates from the internal resistance of the whole circuit.

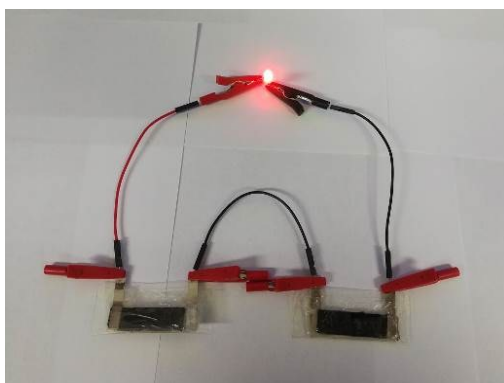

**Fig. S29** Optical photograph exhibiting a red LED indicator (1.8 V) powered by two normal tandem NiS/SnS<sub>2</sub>//Fe<sub>2</sub>O<sub>3</sub>/rGO BSH devices.

## Supplementary Table

**Table S1** Comparison on the energy storage performance of our NiS/SnS<sub>2</sub>@CC electrode with previously reported high-performance battery-type cathode materials for aqueous electrolytes

| Electrode material <sup>a</sup>                                            | Mass loading (mg cm <sup>-2</sup> ) | Electrolyte <sup>b</sup> | Specific capability (mA h g <sup>-1</sup> ) | Current density                                      | Rate capability                                             | Stability     | Ref.      |
|----------------------------------------------------------------------------|-------------------------------------|--------------------------|---------------------------------------------|------------------------------------------------------|-------------------------------------------------------------|---------------|-----------|
| NiS/SnS <sub>2</sub> @CC                                                   | 2.15                                | 6 M KOH                  | 430.4                                       | 2.5 mA cm <sup>-2</sup><br>(1.16 A g <sup>-1</sup> ) | 43% (50 mA cm <sup>-2</sup> )<br>(23.26 A g <sup>-1</sup> ) | 82.6% (1000)  | This work |
| CoNiO <sub>2</sub> @Ni(OH) <sub>2</sub> /CNT                               | 1.23                                | 3 M KOH                  | 539.3                                       | 1 mA cm <sup>-2</sup>                                | 69.8% (10 mA cm <sup>-2</sup> )                             | /             | [10]      |
| Cd-Co-Sn nanorods/NF                                                       | 2.00                                | 2 M KOH                  | 192                                         | 1 A g <sup>-1</sup>                                  | 76% (15 A g <sup>-1</sup> )                                 | 95.3% (1000)  | [11]      |
| Ni-Mo-S nanosheets/NF                                                      | 1.80                                | KOH                      | 312                                         | 1 mA cm <sup>-2</sup>                                | 78.8% (50 mA cm <sup>-2</sup> )                             | 96.6% (10000) | [25]      |
| Zn-Co-S nanowires/NF                                                       | /                                   | 6 M KOH                  | 366.7                                       | 3 mA cm <sup>-2</sup>                                | 62.1% (40 mA cm <sup>-2</sup> )                             | 93.2% (10000) | [35]      |
| Ni-Co-N/NiCo <sub>2</sub> O <sub>4</sub> /graphite fibers                  | /                                   | 3 M KOH                  | 384.8                                       | 4 A g <sup>-1</sup>                                  | 86.5% (20 A g <sup>-1</sup> )                               | 99.8% (3000)  | [51]      |
| TP-Ni <sub>3</sub> S <sub>4</sub> /rGO nanoflakes                          | /                                   | 2 M KOH                  | 224.2                                       | 1 A g <sup>-1</sup>                                  | 72% (20 A g <sup>-1</sup> )                                 | /             | [54]      |
| NiO@CNTs@CuO/Cu fibers                                                     | /                                   | 1 M KOH                  | 230.48                                      | 0.96 mA                                              | 76.8% (12 mA)                                               | 82.7% (2000)  | [56]      |
| H-TiO <sub>2</sub> @Ni(OH) <sub>2</sub> /C fibers                          | 2.00                                | 6 M KOH                  | 306                                         | 1 mV s <sup>-1</sup>                                 | 65% (100 mV s <sup>-1</sup> )                               | /             | [57]      |
| CoNi <sub>2</sub> S <sub>4</sub> /graphene aerogel                         | 2.00                                | 6 M KOH                  | 318.3                                       | 1 A g <sup>-1</sup>                                  | 44.3% (30 A g <sup>-1</sup> )                               | 95.8% (10000) | [S3]      |
| CuCo <sub>2</sub> S <sub>4</sub> nanosheet arrays                          | 3.10                                | 2 M KOH                  | 409.2                                       | 3 mA cm <sup>-2</sup>                                | 77.9% (50 mA cm <sup>-2</sup> )                             | 94.2% (10000) | [S4]      |
| Ni(OH) <sub>2</sub> @NiO-NiCo <sub>2</sub> O <sub>4</sub> nanosheet arrays | 2.05                                | 3 M KOH                  | 326.7                                       | 2 A g <sup>-1</sup>                                  | 89.3% (15 A g <sup>-1</sup> )                               | 98.5% (5000)  | [S5]      |
| (Ni <sub>1-x</sub> Co <sub>x</sub> )Se <sub>2</sub> /NiCo-LDHs/CC          | /                                   | 3 M KOH                  | 170                                         | 2 A g <sup>-1</sup>                                  | 71% (20 A g <sup>-1</sup> )                                 | 89.5% (3000)  | [S6]      |
| NiSe/Ni <sub>3</sub> S <sub>2</sub> /Ni <sub>12</sub> P <sub>5</sub> /NF   | 8.50                                | 3 M KOH                  | 265                                         | 5 mA cm <sup>-2</sup>                                | 69.6% (60 mA cm <sup>-2</sup> )                             | 96% (2000)    | [S7]      |
| Co <sub>3</sub> O <sub>4</sub> /graphene                                   | /                                   | 2 M KOH                  | 135.8                                       | 1 A g <sup>-1</sup>                                  | 94% (10 A g <sup>-1</sup> )                                 | 99.3% (20000) | [S8]      |
| CoO/Co-Cu-S hierarchical nanotubes                                         | 2.00                                | 6 M KOH                  | 320                                         | 2 A g <sup>-1</sup>                                  | 74% (30 A g <sup>-1</sup> )                                 | 96.5% (5000)  | [S9]      |
| Co <sub>9</sub> S <sub>8</sub> /α-MnS@N-C@MoS <sub>2</sub> nanowires       | /                                   | 2 M KOH                  | 306                                         | 1 A g <sup>-1</sup>                                  | 41.2% (10 A g <sup>-1</sup> )                               | 86.9% (10000) | [S10]     |

<sup>a</sup> C: carbon; CNT: carbon nanotube; NF: nickel foam; LDHs: layered double hydroxides

<sup>b</sup> M: mol L<sup>-1</sup>

## Supplementary Note

### Note S1: Calculation of OH<sup>-</sup> diffusion coefficient

The solid-state diffusion coefficient of OH<sup>-</sup> ( $D_{OH^-}$ ) in the electrodes can be estimated through the following equations:<sup>S11</sup>

$$D_{OH^-} = \frac{1}{2} \left( \frac{RT}{AF^2 n^2 C \sigma_\omega} \right)^2 \quad (3)$$

$$Z' = R_s + R_f + R_{ct} + \sigma_\omega \sqrt{\omega} \quad (4)$$

where  $R$  denotes the gas constant (8.314 J mol<sup>-1</sup> K<sup>-1</sup>),  $T$  is the absolute temperature (298.15 K),  $F$  is the Faraday constant (96485.33 C mol<sup>-1</sup>),  $A$  is the footprint area of the electrodes (1 cm<sup>2</sup>),  $C$  is the molar concentration of OH<sup>-</sup> in the electrode materials (~0.006 mol cm<sup>-3</sup>), and  $\sigma_\omega$  is the Warburg coefficient.  $n$  is the number of electrons per molecule involved in the half-reaction for the redox couple, which can be estimated using **Eq. 8** in the Main Text. Clearly, all the  $n$  values of the NiS/SnS<sub>2</sub>@CC, Ni(OH)<sub>2</sub>/SnS<sub>2</sub>@CC, NiS@CC, and Ni(OH)<sub>2</sub>@CC electrodes are 1.

## References

- S1. Q. Q. Ke, C. Guan, M. R. Zheng, Y. T. Hu, K. H. Ho and J. Wang, *J. Mater. Chem. A*, 2015, **3**, 9538-9542.
- S2. K. A. Owusu, L. B. Qu, J. T. Li, Z. Y. Wang, K. N. Zhao, C. Yang, K. M. Hercule, C. Lin, C. W. Shi, Q. L. Wei, L. Zhou and L. Q. Mai, *Nat. Commun.*, 2017, **8** 14267.
- S3. G. J. He, M. Qiao, W. Y. Li, Y. Lu, T. T. Zhao, R. J. Zou, B. Li, J. A. Darr, J. Q. Hu, M. M. Titirici and I. P. Parkin, *Adv. Sci.*, 2017, **4** 1600214.
- S4. A. Bahaa, J. Balamurugan, N. H. Kim and J. H. Lee, *J. Mater. Chem. A*, 2019, **7**, 8620-8632.
- S5. C. V. V. M. Gopi, P. J. S. Rana, R. Padma, R. Vinodh and H. J. Kim, *J. Mater. Chem. A*, 2019, **7**, 6374-6386.
- S6. X. Li, H. J. Wu, C. Guan, A. M. Elshahawy, Y. T. Dong, S. J. Pennycook and J. Wang, *Small*, 2019, **15** 1803859.
- S7. K. Y. Tao, Y. Gong and J. H. Lin, *Nano Energy*, 2019, **55**, 65-81.
- S8. S. H. Yang, Y. Y. Liu, Y. F. Hao, X. P. Yang, W. A. Goddard, X. L. Zhang and B. Q. Cao, *Adv. Sci.*, 2018, **5** 1700659.
- S9. W. Lu, J. L. Shen, P. Zhang, Y. J. Zhong, Y. Hu and X. W. D. Lou, *Angew. Chem. Int. Edit.*, 2019, **58** 15441.
- S10. S. Kandula, K. R. Shrestha, N. H. Kim and J. H. Lee, *Small*, 2018, **14** 1800291.
- S11. K. Kretschmer, B. Sun, J. Q. Zhang, X. Q. Xie, H. Liu and G. X. Wang, *Small*, 2017, **13** 1603318.
